# Supplementary material for: Dietary Glycemic Index, Glycemic Load, and Risk of Coronary Heart Disease, Stroke, and Stroke Mortality: A Systematic Review with Meta-Analysis
Source: PLOS journal article supplement (doi:10.1371/journal.pone.0052182), 2012-12-20
Supplement: S5 (10.1371/journal.pone.0052182.s005) [file journal.pone.0052182.s005]

**Table S1.** Multi-variable adjusted RRs and 95%CI for CHD in the original articles in this meta-analysis

| Source                      | Comparison                                                          | Model        | RR(95%CI)        | Adjustment for Covariates                                                                                                                                                                                                                                                                                                                                                                                                                         |
|-----------------------------|---------------------------------------------------------------------|--------------|------------------|---------------------------------------------------------------------------------------------------------------------------------------------------------------------------------------------------------------------------------------------------------------------------------------------------------------------------------------------------------------------------------------------------------------------------------------------------|
| <b>Dietary GI</b>           |                                                                     |              |                  |                                                                                                                                                                                                                                                                                                                                                                                                                                                   |
| Liu et al, 2000 (Women)     | Highest quintile <i>versus</i> lowest                               | Multivariate | 1.28 (1.00-1.64) | Age; BMI; cigarette smoking; alcohol intake; parental family history of MI before the age of 60; self-reported history of hypertension or history of high cholesterol; menopausal status; aspirin use; use of multiple vitamin E supplement; physical activity; protein intake; intake of saturated, polyunsaturated, trans fats; dietary fiber intake; dietary vitamin E and folate intakes; total energy intake; and total carbohydrate intake. |
| Van Dam et al, 2000 (Men)   | Highest tertile (median, 85) <i>versus</i> lowest (median, 77)      | Crude        | 1.19 (0.72-1.96) | Age; BMI; physical activity; smoking; prescribed diet; energy intake; intake of saturated fat, polyunsaturated fat, carbohydrates and alcohol; insulin; glucose; HDL-cholesterol; and log-transformed triacylglycerol concentration.                                                                                                                                                                                                              |
|                             | Per 1-point increment                                               | Multivariate | 1.02 (0.98-1.07) |                                                                                                                                                                                                                                                                                                                                                                                                                                                   |
| Halton et al, 2006 (Women)  | Highest decile <i>versus</i> lowest                                 | Multivariate | 1.19 (0.91-1.55) | Age; BMI; smoking status; postmenopausal hormone use; hours of physical activity per week; alcohol intake; number of times aspirin was used per week; use of multivitamins; use of vitamin E supplement; history of hypertension; history of hypercholesterolemia; and parental history of MI.                                                                                                                                                    |
| Beulens et al, 2007 (Women) | Highest quartile <i>versus</i> lowest                               | Multivariate | 1.44 (1.10-1.89) | Age; hypertension; cholesterolemia; smoking; BMI; mean SBP; total physical activity; menopausal status; hormone replacement therapy; oral contraceptives; alcohol intake; total energy intake; energy-adjusted intake of vitamin E, protein, dietary fiber, saturated fat, poly- and monounsaturated fat.                                                                                                                                         |
| Levitan et al, 2007 (Men)   | Highest quartile (median, 82.9) <i>versus</i> lowest (median, 73.0) | Model 1      | 1.12 (0.97-1.30) | Age                                                                                                                                                                                                                                                                                                                                                                                                                                               |
|                             |                                                                     | Multivariate | 0.99 (0.84-1.17) | Age; BMI; physical activity; self-reported history of hypertension; family history MI before 60y of age; use of aspirin; cigarette smoking; marital status; education; and quartiles of intake of total energy, carbohydrate, saturated fat, polyunsaturated fat, alcohol, and cereal fiber.                                                                                                                                                      |

Continuous Table S1

| Source                               | Comparison                                                      | Model                   | RR (95%CI)                           | Adjustment for Covariates                                                                                                                                                                                                                                                                                                                                                              |
|--------------------------------------|-----------------------------------------------------------------|-------------------------|--------------------------------------|----------------------------------------------------------------------------------------------------------------------------------------------------------------------------------------------------------------------------------------------------------------------------------------------------------------------------------------------------------------------------------------|
| Levitan et al, 2010 (Women)          | Highest quartile (mean, 80.5) <i>versus</i> lowest (mean, 68.6) | Model 1<br>Multivariate | 1.16 (0.98-1.37)<br>1.12 (0.92-1.35) | Age<br>Additional adjustment for education; BMI; physical activity; cigarette smoking; living alone; postmenopausal hormone use; aspirin use; total energy intake; alcohol intake; fiber intake; saturated fat; polyunsaturated fat; protein; carbohydrate; family history of MI before 60 years; self-reported history of hypertension; and self-reported history of high cholesterol |
| Sieri et al, 2010 (Men)              | Highest quartile (mean, 56.9) <i>versus</i> lowest (mean 50.0)  | Model 1<br>Multivariate | 1.00 (0.73-1.37)<br>0.96 (0.70-1.33) | Age<br>Age; nonalcohol energy intake; hypertension; smoking; education; BMI; fiber intake; physical activity; and saturated fat intake.                                                                                                                                                                                                                                                |
| Sieri et al, 2010 (Women)            | Highest quartile (mean, 57.1) <i>versus</i> lowest (mean 49.9)  | Model 1<br>Multivariate | 1.47 (0.93-2.31)<br>1.42 (0.90-2.25) | Age<br>Age; nonalcohol energy intake; hypertension; smoking; education; BMI; fiber intake; physical activity; and saturated fat intake.                                                                                                                                                                                                                                                |
| Grau et al, 2011 (Men)               | 95 percentile <i>versus</i> 50 percentile                       | Model 1<br>Multivariate | 0.82 (0.58-1.17)<br>0.71 (0.49-1.02) | Age and total energy intake<br>Age; total energy intake; BMI; energy-adjusted carbohydrate, fat, protein and fiber intake; cohort; level of education; level of physical activity and smoking status; alcohol; saturated fat.                                                                                                                                                          |
| Grau et al, 2011 (Women)             | 95 percentile <i>versus</i> 50 percentile                       | Multivariate            | 1.38 (0.88-2.17)                     | The same covariates mentioned above.                                                                                                                                                                                                                                                                                                                                                   |
| Mursu et al, 2011 (Men)              | Highest quartile <i>versus</i> lowest                           | Model 1<br>Multivariate | 1.15 (0.86-1.53)<br>1.25 (0.92-1.69) | Age; examination years; and smoking<br>Age; examination years; smoking; BMI; SBP; hypertension medication; serum HDL and LDL-C; tryglicerides; leisure-time physical activity; education; family history of CVD; diabetes; alcohol; energy intake and energy adjusted intake of folate, fiber, vitamin C, polyunsaturated and saturated fat.                                           |
| Hardy et al, 2010 (Whites)           | Per 5-unit increment                                            | Multivariate            | 1.01 (0.94-1.09)                     | Age; sex; BMI; SBP; total cholesterol; HDL-C; anti-hypertension medications; cigarette smoking; sports activity index; keys dietary score(calculated using polyunsaturated fat, dietary cholesterol and energy); fasting blood glucose; and total energy-adjusted GL.                                                                                                                  |
| Hardy et al, 2010 (Africa Americans) | Per 5-unit increment                                            | Multivariate            | 1.16 (0.98-1.37)                     | The same covariates mentioned above.                                                                                                                                                                                                                                                                                                                                                   |

Continuous Table S1

| Source                     | Comparison                                                    | Model                   | RR(95%CI)                            | Adjustment for Covariates                                                                                                                                                                                                                                                                                                                                                                                                                   |
|----------------------------|---------------------------------------------------------------|-------------------------|--------------------------------------|---------------------------------------------------------------------------------------------------------------------------------------------------------------------------------------------------------------------------------------------------------------------------------------------------------------------------------------------------------------------------------------------------------------------------------------------|
| Burger et al, 2011 (Men)   | Per SD increment (SD=3.9)                                     | Multivariate            | 1.02 (0.92-1.13)                     | Age; smoking; packyears; education; BMI; physical activity; hypertension; total energy; energy-adjusted carbohydrate and protein intake, alcohol, vitamin C, dietary fiber, saturated, monounsaturated and polyunsaturated fat, plasma TC, and HDL-C.                                                                                                                                                                                       |
| Burger et al, 2011 (Women) | Per SD increment (SD=3.9)                                     | Multivariate            | 1.07 (0.92-1.24)                     | Age; smoking; packyears; education; BMI; physical activity; hypertension; oral contraceptives; total energy; energy-adjusted carbohydrate and protein intake, alcohol, vitamin C, dietary fiber, saturated, monounsaturated and polyunsaturated fat, plasma TC, and HDL-C.                                                                                                                                                                  |
| Pierucci et al, 2011       | Highest tertile <i>versus</i> lowest                          | Multivariate            | 1.30 (0.63-2.70)                     | Age; gender; BMI; cigarette smoking; hypertension.                                                                                                                                                                                                                                                                                                                                                                                          |
| <b>Dietary GL</b>          |                                                               |                         |                                      |                                                                                                                                                                                                                                                                                                                                                                                                                                             |
| Liu et al, 2000 (Women)    | Highest quintile (Mean, 206) <i>versus</i> lowest (Mean, 117) | Model 1<br>Multivariate | 1.57 (1.27-1.95)<br>1.98 (1.41-2.77) | Age and smoking<br>Additional adjustment for BMI; alcohol intake; parental family history of MI before the age of 60; self-reported history of hypertension or history of high cholesterol; menopausal status; aspirin use; use of multiple vitamin E supplement; physical activity; protein intake; dietary fiber, vitamin E, and folate intakes; and total energy intake; all fats.                                                       |
| Van Dam et al, 2000 (Men)  | Highest tertile <i>versus</i> lowest                          | Multivariate            | 1.06 (0.52-2.14)                     | Age; BMI; physical activity; smoking; prescribed diet; energy intake; intake of saturated fat, polyunsaturated fat, and alcohol; insulin; glucose; HDL-cholesterol; log-transformed triylglycerol concentrations.                                                                                                                                                                                                                           |
|                            | Per 1-point increment                                         | Multivariate            | 1.00 (0.99-1.01)                     | The same covariates mentioned above.                                                                                                                                                                                                                                                                                                                                                                                                        |
| Halton et al, 2006 (Women) | Highest decile <i>versus</i> lowest decile                    | Model 1<br>Multivariate | 1.13 (0.90-1.43)<br>1.90 (1.15-3.15) | Age and smoking<br>Additional adjustment for BMI; postmenopausal hormone use; hours of physical activity per week; alcohol intake; number of times aspirin was used per week; use of multivitamins; use of vitamin E supplement; history of hypertension; history of hypercholesterolemia; and parental history of MI; total protein; cereal fiber; saturated fat; polyunsaturated fat; monounsaturated fat; trans fat; and total calories. |

Continuous Table S1

| Source                      | Comparison                                                        | Model                   | RR (95%CI)                           | Adjustment for Covariates                                                                                                                                                                                                                                                                                                                                                               |
|-----------------------------|-------------------------------------------------------------------|-------------------------|--------------------------------------|-----------------------------------------------------------------------------------------------------------------------------------------------------------------------------------------------------------------------------------------------------------------------------------------------------------------------------------------------------------------------------------------|
| Beulens et al, 2007 (Women) | Highest quartile (mean, 121.8) <i>versus</i> lowest (mean, 78.5)  | Multivariate            | 1.44 (0.95-2.19)                     | Age; hypertension; cholesterolemia; smoking; BMI; mean SBP; total physical activity; menopausal status; hormone replacement therapy; oral contraceptives; alcohol intake; total energy intake; energy-adjusted intake of vitamin E, protein, dietary fiber, saturated fat, poly- and monounsaturated fat.                                                                               |
| Levitan et al, 2007 (Men)   | Highest quartile (median, 250) <i>versus</i> lowest (median, 180) | Model 1<br>Multivariate | 1.03 (0.89-1.19)<br>1.04 (0.80-1.34) | Age<br>Additional adjustment for BMI; physical activity; self-reported history of hypertension; family history MI before 60y of age; use of aspirin; cigarette smoking; marital status; education; and quartiles of intake of total energy, carbohydrate, saturated fat, polyunsaturated fat, alcohol, and cereal fiber.                                                                |
| Levitan et al, 2010 (Women) | Highest quartile (mean, 188) <i>versus</i> lowest (mean, 128)     | Model 1<br>Multivariate | 1.09 (0.92-1.29)<br>1.22 (0.90-1.65) | Age<br>Additional adjustment for education; BMI; physical activity; cigarette smoking; living alone; postmenopausal hormone use; aspirin use; total energy intake; alcohol intake; fiber intake; saturated fat; polyunsaturated fat; protein; carbohydrate; family history of MI before 60 years; self-reported history of hypertension; and self-reported history of high cholesterol. |
| Sieri et al, 2010 (Men)     | Highest quartile (mean, 189.0) <i>versus</i> lowest (mean 118.0)  | Model 1<br>Multivariate | 0.97 (0.70-1.34)<br>1.14 (0.75-1.75) | Age<br>Age; nonalcohol energy intake; hypertension; smoking; education; BMI; fiber intake; physical activity; and saturated fat intake.                                                                                                                                                                                                                                                 |
| Sieri et al, 2010 (Women)   | Highest quartile (mean, 185.8) <i>versus</i> lowest (mean 122.8)  | Model 1<br>Multivariate | 1.97 (1.17-3.32)<br>2.24 (1.26-3.98) | Age<br>Additional adjustment for nonalcohol energy intake; hypertension; smoking; education; BMI; fiber intake; physical activity; and saturated fat intake.                                                                                                                                                                                                                            |
| Grau et al, 2011 (Men)      | 95 percentile <i>versus</i> 50 percentile                         | Multivariate            | 1.11 (0.76-1.62)                     | Age; total energy intake; BMI; cohort; level of education; level of physical activity.                                                                                                                                                                                                                                                                                                  |
| Grau et al, 2011 (Women)    | 95 percentile <i>versus</i> 50 percentile                         | Multivariate            | 1.16 (0.84-1.59)                     | The same covariates mentioned above.                                                                                                                                                                                                                                                                                                                                                    |
| Pierucci et al, 2011        | Highest tertile <i>versus</i> lowest                              | Multivariate            | 1.13 (0.54-2.35)                     | Age; gender; BMI; cigarette smoking; hypertension.                                                                                                                                                                                                                                                                                                                                      |

Continuous Table S1

| Source                               | Comparison                                                 | Model                   | RR (95%CI)                           | Adjustment for Covariates                                                                                                                                                                                                                                                                                                            |
|--------------------------------------|------------------------------------------------------------|-------------------------|--------------------------------------|--------------------------------------------------------------------------------------------------------------------------------------------------------------------------------------------------------------------------------------------------------------------------------------------------------------------------------------|
| Mursu et al, 2011                    | Highest quartile (mean, 179.7) versus lowest (mean, 102.3) | Model 1<br>Multivariate | 0.95 (0.71-1.26)<br>1.11 (0.79-1.57) | Age; examination years; smoking.<br>Additional adjustment for BMI; SBP; hypertension medication; serum HDL-C and LDL-C; triglycerides; leisure-time physical activity; education; family history of CVD; diabetes; alcohol; energy intake and energy adjusted intake of folate, fiber, vitamin C, polyunsaturated and saturated fat. |
| Hardy et al, 2010 (Whites)           | Per 30-unit increment                                      | Multivariate            | 1.11 (1.01-1.21)                     | Age; sex; BMI; SBP; total cholesterol; HDL-C; anti-hypertension medications; cigarette smoking; sports activity index; keys dietary score (calculated using polyunsaturated fat, dietary cholesterol and energy); fasting blood glucose; and total energy-adjusted GL.                                                               |
| Hardy et al, 2010 (Africa Americans) | Per 30-unit increment                                      | Multivariate            | 1.04 (0.87-1.23)                     | The same covariates mentioned above.                                                                                                                                                                                                                                                                                                 |
| Burger et al, 2011 (Men)             | Per SD increment (SD=20.5)                                 | Multivariate            | 1.14 (0.99-1.32)                     | Age; smoking; packyears; education; BMI; physical activity; hypertension; total energy; energy-adjusted alcohol, vitamin C, dietary fiber, and saturated, monounsaturated, and polyunsaturated fat, plasma TC, and HDL-C.                                                                                                            |
| Burger et al, 2011 (Women)           | Per SD increment (SD=20.5)                                 | Multivariate            | 1.05 (0.86-1.28)                     | The same covariates mentioned above.                                                                                                                                                                                                                                                                                                 |

Abbreviations: GI, glycemic index; GL, glycemic load; BMI, body mass index; MI, myocardial infarction; SBP, systolic blood pressure; TC, total cholesterol; HDL-C, high-density lipoprotein cholesterol; RR, relative risk; CI, Confidence interval.
