# Supplementary material for: Dietary Glycemic Index, Glycemic Load, and Risk of Coronary Heart Disease, Stroke, and Stroke Mortality: A Systematic Review with Meta-Analysis
Source: PLOS journal article supplement (doi:10.1371/journal.pone.0052182), 2012-12-20
Supplement: S7 (10.1371/journal.pone.0052182.s007) [file journal.pone.0052182.s007]

**Table S3.** Multi-variable adjusted RRs and 95%CI for stroke-related mortality in the original articles in this meta-analysis

| Source                  | Comparison                                                         | Model                                | RR (95%CI)                           | Adjustment for Covariates                                                                                                                                                                    |
|-------------------------|--------------------------------------------------------------------|--------------------------------------|--------------------------------------|----------------------------------------------------------------------------------------------------------------------------------------------------------------------------------------------|
| Kaushik et al, 2009     | Highest tertile (Median, 60.6) <i>versus</i> lowest (Median, 52.4) | Multivariate <sup>a</sup>            | 1.91 (1.01-3.47)                     | Age; gender; SBP; DBP; antihypertensive medication use; BMI; smoking status; educational qualifications; fair or poor self-rated health; history of MI and stroke; and presence of diabetes. |
| Oba et al, 2010 (Men)   | Highest quartile (Mean, 70.3) <i>versus</i> lowest (Mean, 58.0)    | Model 1<br>Multivariate <sup>a</sup> | 0.82 (0.49-1.37)<br>0.78 (0.41-1.47) | Age<br>Additional adjustment for BMI; smoking status; physical activity; reported history of hypertension; education; and intake of total energy, alcohol dietary fiber, salt and total fat. |
| Oba et al, 2010 (Women) | Highest quartile (Mean, 70.0) <i>versus</i> lowest (Mean, 58.3)    | Model 1<br>Multivariate <sup>a</sup> | 2.46 (1.30-4.63)<br>2.09 (1.01-4.31) | Age<br>Additional adjustment for BMI; smoking status; physical activity; reported history of hypertension; education; and intake of total energy, alcohol dietary fiber, salt and total fat. |

Abbreviations: GI, glycemic index; BMI, body mass index; MI, myocardial infarction; SBP, systolic blood pressure; DBP, diastolic blood pressure; RR, relative risk; CI, confidence interval
