# Supplementary material for: Dietary Glycemic Index, Glycemic Load, and Risk of Coronary Heart Disease, Stroke, and Stroke Mortality: A Systematic Review with Meta-Analysis
Source: PLoS One. 2012 Dec 20;7(12):e52182. doi: 10.1371/journal.pone.0052182 (PMC3527433; doi:10.1371/journal.pone.0052182)
Supplement: Table S2 — Multi-variable adjusted RRs and 95%CI for stroke in the original articles in this meta-analysis. (PDF) [file pone.0052182.s006.pdf]

**Table S2.** Multi-variable adjusted RRs and 95%CI for stroke in the original articles in this meta-analysis

| Source                                      | Comparison                                                                | Model                                | RR (95%CI)                           | Adjustment for Covariates                                                                                                                                                                                                                                                                                        |
|---------------------------------------------|---------------------------------------------------------------------------|--------------------------------------|--------------------------------------|------------------------------------------------------------------------------------------------------------------------------------------------------------------------------------------------------------------------------------------------------------------------------------------------------------------|
| <b>Dietary GI</b>                           |                                                                           |                                      |                                      |                                                                                                                                                                                                                                                                                                                  |
| Oh et al, 2005<br>(Hemorrhagic stroke)      | Highest quintile<br>(median, 80.3) <i>versus</i><br>lowest (median, 68.0) | Model 1<br>Multivariate <sup>a</sup> | 1.01 (0.71-1.44)<br>1.06 (0.73-1.53) | Age, smoking<br>Additional adjustment for BMI; alcohol intake; parental history for MI; history of hypertension, hypercholesterolemia, and diabetes; menopausal status and postmenopausal hormone use; aspirin use; multivitamin use; Vitamin E supplement use; physical activity; energy; cereal fiber.         |
| Oh et al, 2005<br>(Ischemic stroke)         | Highest quintile<br>(median, 80.3) <i>versus</i><br>lowest (median, 68.0) | Model 1<br>Multivariate <sup>a</sup> | 1.12 (0.85-1.48)<br>1.05 (0.78-1.40) | Age, smoking<br>Additional adjustment for BMI; alcohol intake; parental history for MI; history of hypertension, hypercholesterolemia, and diabetes; menopausal status and postmenopausal hormone use; aspirin use; multivitamin use; Vitamin E supplement use; physical activity; energy; cereal fiber.         |
| Beulens et al, 2007                         | Highest quartile<br><i>versus</i> lowest                                  | Multivariate <sup>a</sup>            | 1.12 (0.75-1.69)                     | Age; hypertension; cholesterolemia; smoking; BMI; mean SBP; total physical activity; menopausal status; HRT use; oral contraceptives; alcohol intake; total energy intake; energy-adjusted intake of vitamin E, protein, dietary fiber, saturated fat, poly- and monounsaturated fat.                            |
| Levitan et al, 2007<br>(Hemorrhagic stroke) | Highest quartile<br>(median, 82.9) <i>versus</i><br>lowest (median, 73.0) | Model 1<br>Multivariate <sup>a</sup> | 1.17 (0.77-1.79)<br>1.19 (0.77-1.83) | Age<br>Adjusted for age; BMI; physical activity; self-reported history of hypertension; cigarette smoking; and quartiles of intake of total energy and cereal fiber.                                                                                                                                             |
| Levitan et al, 2007<br>(Ischemic stroke)    | Highest quartile<br>(median, 82.9) <i>versus</i><br>lowest (median, 73.0) | Model 1<br>Multivariate <sup>a</sup> | 1.12 (0.90-1.39)<br>1.09 (0.85-1.38) | Age<br>Adjusted for age; BMI; physical activity; self-reported history of hypertension; family history MI before 60y of age; use of aspirin; cigarette smoking; marital status; education; and quartiles of intake of total energy, carbohydrate, saturated fat, polyunsaturated fat, alcohol, and cereal fiber. |

Continuous Table S2

| Source                                   | Comparison                                                           | Model                     | RR (95%CI)       | Adjustment for Covariates                                                                                                                                                                                                                                                                                 |
|------------------------------------------|----------------------------------------------------------------------|---------------------------|------------------|-----------------------------------------------------------------------------------------------------------------------------------------------------------------------------------------------------------------------------------------------------------------------------------------------------------|
| Burger et al, 2011 (Men)                 | Per SD increment (SD=3.9)                                            | Multivariate              | 1.27 (1.02-1.58) | Age; smoking; packyears; education; BMI; physical activity; hypertension; total energy; energy-adjusted carbohydrate and protein intake; alcohol; vitamin C; dietary fiber; saturated, monounsaturated and polyunsaturated fat; plasma TC; HDL-C.                                                         |
| Burger et al, 2011 (Women)               | Per SD increment (SD=3.9)                                            | Multivariate              | 0.95 (0.75-1.22) | Age; smoking; packyears; education; BMI; physical activity; hypertension; total energy; energy-adjusted carbohydrate and protein intake; alcohol; vitamin C; dietary fiber; saturated, monounsaturated and polyunsaturated fat; plasma TC; HDL-C.                                                         |
| <b>Dietary GL</b>                        |                                                                      |                           |                  |                                                                                                                                                                                                                                                                                                           |
| Oh et al, 2005 (Hemorrhagic stroke)      | Highest quintile (median, 166.8) <i>versus</i> lowest (median, 96.4) | Model 1                   | 1.01 (0.68-1.50) | Age, smoking                                                                                                                                                                                                                                                                                              |
|                                          |                                                                      | Multivariate <sup>a</sup> | 1.23 (0.81-1.89) | Additional adjustment for BMI; alcohol intake; parental history for MI; history of hypertension, hypercholesterolemia, and diabetes; menopausal status and postmenopausal hormone use; aspirin use; multivitamin use; Vitamin E supplement use; physical activity; energy; cereal fiber.                  |
| Oh et al, 2005 (Ischemic stroke)         | Highest quintile (median, 166.8) <i>versus</i> lowest (median, 96.4) | Model 1                   | 1.12 (0.84-1.49) | Age, smoking                                                                                                                                                                                                                                                                                              |
|                                          |                                                                      | Multivariate <sup>a</sup> | 1.12 (0.81-1.54) | Additional adjustment for BMI; alcohol intake; parental history for MI; history of hypertension, hypercholesterolemia, and diabetes; menopausal status and postmenopausal hormone use; aspirin use; multivitamin use; Vitamin E supplement use; physical activity; energy; cereal fiber.                  |
| Beulens et al, 2007                      | Highest quartile (mean, 121.8) <i>versus</i> lowest (mean, 78.5)     | Multivariate <sup>a</sup> | 1.55 (0.81-2.97) | Age; hypertension; cholesterolemia; smoking; BMI; mean SBP; total physical activity; menopausal status; hormone replacement therapy; oral contraceptives; alcohol intake; total energy intake; energy-adjusted intake of vitamin E, protein, dietary fiber, saturated fat, poly- and monounsaturated fat. |
| Levitan et al, 2007 (Hemorrhagic stroke) | Highest quartile (median, 250) <i>versus</i> lowest (median, 180)    | Model 1                   | 1.23 (0.80-1.90) | Age                                                                                                                                                                                                                                                                                                       |
|                                          |                                                                      | Multivariate <sup>a</sup> | 1.44 (0.91-2.27) | Adjusted for age; BMI; physical activity; self-reported history of hypertension; cigarette smoking; and quartiles of intake of total energy and cereal fiber.                                                                                                                                             |

Continuous Table S2

| Source                                   | Comparison                                                              | Model                                | RR (95%CI)                           | Adjustment for Covariates                                                                                                                                                                                                                                                                                        |
|------------------------------------------|-------------------------------------------------------------------------|--------------------------------------|--------------------------------------|------------------------------------------------------------------------------------------------------------------------------------------------------------------------------------------------------------------------------------------------------------------------------------------------------------------|
| Levitan et al, 2007<br>(Ischemic stroke) | Highest quartile<br>(median, 250) <i>versus</i><br>lowest (median, 180) | Model 1<br>Multivariate <sup>a</sup> | 1.05 (0.85-1.29)<br>1.05 (0.74-1.49) | Age<br>Adjusted for age; BMI; physical activity; self-reported history of hypertension; family history MI before 60y of age; use of aspirin; cigarette smoking; marital status; education; and quartiles of intake of total energy, carbohydrate, saturated fat, polyunsaturated fat, alcohol, and cereal fiber. |
| Burger et al, 2011 (Men)                 | Per SD increment<br>(SD=20.5)                                           | Multivariate                         | 1.23 (0.90-1.69)                     | Age; smoking; packyears; education; BMI; physical activity; hypertension; total energy; energy-adjusted carbohydrate and protein intake; alcohol; vitamin C; dietary fiber; saturated, monounsaturated and polyunsaturated fat; plasma TC; HDL-C.                                                                |
| Burger et al, 2011 (Women)               | Per SD increment<br>(SD=20.5)                                           | Multivariate                         | 0.90 (0.65-1.26)                     | Age; smoking; packyears; education; BMI; physical activity; hypertension; total energy; energy-adjusted carbohydrate and protein intake; alcohol; vitamin C; dietary fiber; saturated, monounsaturated and polyunsaturated fat; plasma TC; HDL-C.                                                                |

Abbreviations: GI, glycemic index; GL, glycemic load; BMI, body mass index; MI, myocardial infarction; SBP, systolic blood pressure; TC, total cholesterol; HDL-C, high-density lipoprotein cholesterol; RR, relative risk; CI, Confidence interval.
